# Supplementary material
Source: PubMed Central journal article supplement (PMC1345697)
Supplement: nar_34_2_584__1.pdf [file nar_34_2_584__1.pdf]

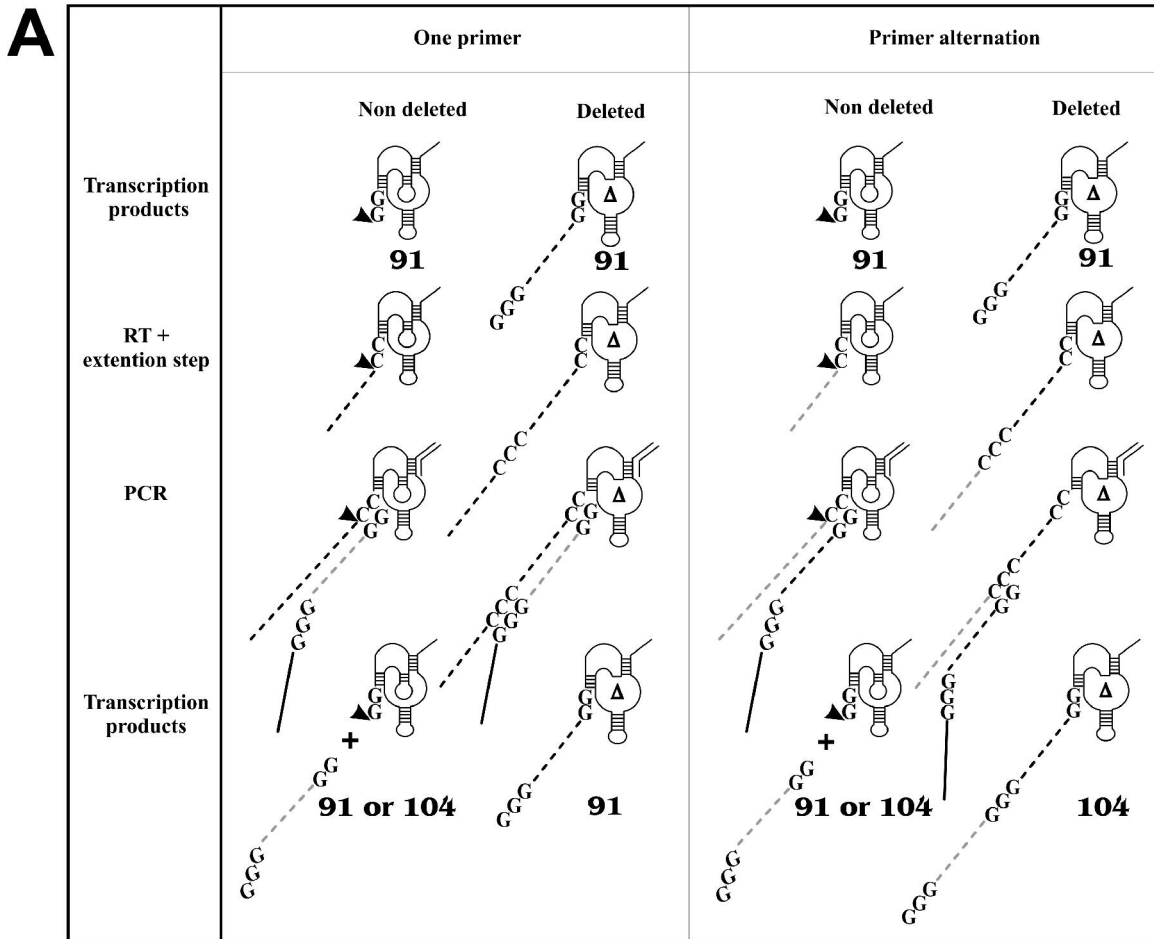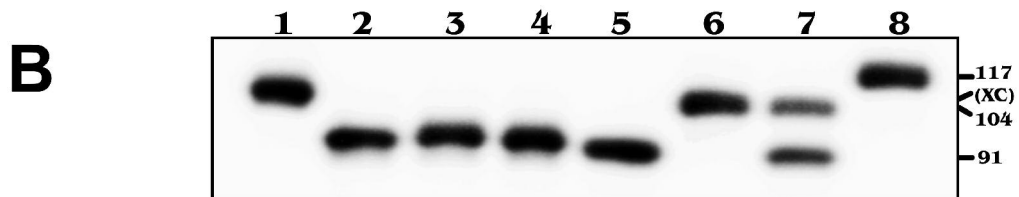

Supplementary data Figure 1  
 Nehdi and Perreault  
 HDV ribozyme *in vitro* selection

## Supplementary Figure

**Figure 1.** Discrimination between the active and inactive 91-nt RNA species. **(A)** Schematic representation of the species produced using the 2 selection strategies. The left and right panels illustrate the strategies involving the use of either one sense primer, or of an alternation of 2 sense primers. **(B)** Autoradiogram of the transcription mixture fractionated on a 6% PAGE gel performed in order to verify the efficiency of the alternation strategy. Lanes 1 to 4 are run-off transcription from DNA templates containing poly-dT tails (i.e. cycle 1). Lanes 5 to 8 are run-off transcription from DNA templates produced after alternation of the sense primers (i.e. cycle 2). Lanes 1 and 8 are run-off transcriptions of the inactive ( $G_{76}$ ) RNA species (i.e. producing transcripts of 104 and 117 nt, respectively). Lanes 2 and 5 are run-off transcriptions of the active ( $C_{76}$ ) RNA species (i.e. producing transcripts of 104 that self-cleaved to yield RNA molecules of 91 nt in both cases). Lane 3 and 6 correspond to a run-off transcription of the 13-nt truncated version (i.e. producing transcripts of 91 and 104 nt, respectively). Lane 4 and 7 correspond to a run-off transcription obtained when a mixture of DNA templates encoding the active ( $C_{76}$ ) and the truncated version is used (i.e. producing transcripts of both 91 and 104 nt). The size of the RNA species in nucleotides and the position of xylene cyanol (XC) are indicated beside the gel.

**Table 1. Sequence of all the nucleotides used in this study**

| Name              | Sequence                                                                                                                        |
|-------------------|---------------------------------------------------------------------------------------------------------------------------------|
| <b>T7PolyA</b>    | 5' CTAATACGACTCACTATAGGAAAAAAAAAAGG 3'                                                                                          |
| <b>T7PolyT</b>    | 5' CTAATACGACTCACTATAGGTTTTTTTTTTGG 3'                                                                                          |
| <b>T7PolyANNN</b> | 5' CTAATACGACTCACTATAGGAAAAAAAAAAGNNN 3'                                                                                        |
| <b>T7PolyTNNN</b> | 5' CTAATACGACTCACTATAGGTTTTTTTTTTGGNNN 3'                                                                                       |
| <b>OP2</b>        | 5' GTTTGTTTGTGTTGTTGAGGTGGCTCGC 3'                                                                                              |
| <b>C122</b>       | 5' GTTTGTTTGTGTTGTTGAGGTGGCTCGCCCTTAGCCATGCGAAGCCGCATGCCAGGTCGGACCGGAGGAGGTGGCGAGCCATGCCGACCCTTTTTTTTTTCCCTATAGTGAGTCGTATTAG 3' |
| <b>G122</b>       | 5' GTTTGTTTGTGTTGTTGAGGTGGCTCGCCCTTACCCATGCGAAGCCGCATGCCAGGTCGGACCGGAGGAGGTGGCGAGCCATGCCGACCCTTTTTTTTTTCCCTATAGTGAGTCGTATTAG 3' |
| <b>J4/2N</b>      | 5' GTTTGTTTGTGTTGTTGAGGTGGCTCGCCNNNNNNCATGCGAAGCCGCATGCCAGGTCGGACCGGAGGAGGTGGCGAGCCATGCCGACCCTTTTTTTTTTCCCTATAGTGAGTCGTATTAG 3' |
| <b>25N</b>        | 5' GTTTGTTTGTGTTGTTGAGGTGGCTCGCCNNNNNGNCATGCGAAGCCGCATGNCCAGNNNGNNNNNNNGNNNNNCGAGCCATGCCNNNCCTTTTTTTTTTCCCTATAGTGAGTCGTATTAG 3' |

Supplementary data Table 1  
 Nehdi and Perreault  
 HDV ribozyme *in vitro* selection

| Table 2. J4/2 selected sequences |          |                      |    |    |    |    |      |
|----------------------------------|----------|----------------------|----|----|----|----|------|
| Selected ribozymes               |          | J4/2 random sequence |    |    |    |    |      |
| Cycle (number)                   | Name     | 75                   | 76 | 77 | 78 | 79 | 80 + |
| 2(2), 3(3), 4(3)                 | WT       | G                    | C  | T  | A  | A  | G    |
| 3(1)                             | J4/2N310 | G                    | C  | T  | A  | G  | A    |
| 1(1)                             | J4/2N15  | G                    | C  | T  | A  | T  | G    |
| 4(1)                             | J4/2N43  | G                    | C  | T  | G  | A  | -    |
| 4(1)                             | J4/2N47  | G                    | C  | T  | G  | T  | G    |
| 3(1)                             | J4/2N31  | A                    | C  | T  | G  | A  | G    |
| 3(1)                             | J4/2N32  | A                    | C  | T  | G  | A  | T    |
| 1(1), 2(1)                       | J4/2N111 | G                    | C  | T  | T  | A  | C    |
| 4(1)                             | J4/2N412 | G                    | C  | T  | T  | A  | A    |
| 4(1)                             | J4/2N413 | G                    | C  | T  | T  | A  | G    |
| 1(1)                             | J4/2N116 | A                    | C  | A  | C  | T  | T    |
| 2(1)                             | J4/2N29  | G                    | C  | A  | C  | T  | C    |
| 4(1)                             | J4/2N416 | G                    | C  | A  | C  | A  | A    |
| 4(1)                             | J4/2N417 | G                    | C  | A  | C  | A  | C    |
| 3(1)                             | J4/2N37  | G                    | C  | A  | A  | C  | -    |
| 4(1)                             | J4/2N46  | G                    | C  | A  | A  | G  | A    |
| 3(1)                             | J4/2N39  | G                    | C  | A  | A  | G  | C    |
| 1(1)                             | J4/2N14  | G                    | C  | A  | A  | G  | C    |
| 4(1)                             | J4/2N419 | G                    | C  | A  | A  | A  | T    |
| 2(1)                             | J4/2N24  | G                    | C  | A  | G  | G  | C    |
| 2(1)                             | J4/2N23  | G                    | C  | A  | G  | G  | A A  |
| 4(2)                             | J4/2N418 | G                    | C  | A  | G  | A  | T    |
| 3(1)                             | J4/2N38  | G                    | C  | A  | T  | G  | A    |
| 1(1), 2(1), 4(1)                 | J4/2N29  | A                    | C  | A  | T  | A  | G    |
| 3(1)                             | J4/2N314 | G                    | C  | A  | T  | A  | A    |
| 2(1)                             | J4/2N25  | G                    | C  | G  | A  | G  | G    |
| 4(1)                             | J4/2N411 | A                    | C  | G  | A  | A  | T    |
| 1(1)                             | J4/2N113 | G                    | C  | G  | T  | A  | T    |
| 4(1)                             | J4/2N415 | G                    | C  | G  | T  | T  | G    |
| 1(1)                             | J4/2N11  | A                    | C  | G  | G  | G  | A    |
| 3(1)                             | J4/2N33  | G                    | C  | G  | G  | C  | G    |
| 1(1)                             | J4/2N115 | G                    | C  | G  | C  | A  | C    |
| 3(1)                             | J4/2N311 | G                    | C  | C  | A  | A  | G    |
| 2(1)                             | J4/2N28  | G                    | C  | C  | A  | A  | T    |
| 3(1)                             | J4/2N313 | G                    | C  | C  | A  | A  | C    |
| 1(1)                             | J4/2N19  | A                    | C  | C  | C  | A  | A    |
| 1(1)                             | J4/2N110 | C                    | C  | C  | G  | A  | A    |
| 1(1)                             | J4/2N112 | G                    | C  | C  | T  | A  | -    |
| 4(1)                             | J4/2N414 | A                    | C  | C  | T  | T  | G    |
| 2(1)                             | J4/2N26  | G                    | T  | C  | T  | A  | A    |
| 4(1)                             | J4/2N49  | G                    | T  | C  | T  | A  | C    |
| 4(1)                             | J4/2N420 | G                    | A  | C  | T  | C  | G    |
| 3(1)                             | J4/2N35  | G                    | G  | C  | T  | G  | A    |
| 3(1)                             | J4/2N312 | A                    | G  | C  | C  | A  | A    |
| 4(1)                             | J4/2N48  | G                    | A  | C  | C  | A  | A    |
| 1(1), 2(1)                       | J4/2N17  | G                    | T  | C  | G  | A  | A    |
| 1(1)                             | J4/2N18  | A                    | A  | C  | G  | A  | A    |
| 4(1)                             | J4/2N410 | T                    | A  | C  | G  | A  | A    |
| 2(1), 3(1), 4(2)                 | J4/2N22  | T                    | G  | C  | G  | A  | A    |
| 3(1), 4(1)                       | J4/2N34  | T                    | G  | C  | G  | G  | A    |
| 2(1), 4(1)                       | J4/2N42  | T                    | A  | C  | C  | G  | A    |
| 4(2)                             | J4/2N44  | G                    | G  | C  | C  | G  | A    |
| 1(1)                             | J4/2N13  | T                    | G  | C  | C  | G  | G    |
| 4(1)                             | J4/2N45  | G                    | T  | C  | A  | G  | A    |

+ and - indicate insertion and deletion of a nucleotide, respectively.

Supplemental data: Table 2.  
Nehdi and Perreault  
HDV ribozyme *in vitro* selection

| Selected ribozymes               |                                   | 25N random sequence               |         |   |    |    |    |    |    |    |    |    |    |    |    |    |    |    |    |    |    |      |    |    |    |    |    |   |
|----------------------------------|-----------------------------------|-----------------------------------|---------|---|----|----|----|----|----|----|----|----|----|----|----|----|----|----|----|----|----|------|----|----|----|----|----|---|
| Constant primer (25/50 variants) | Random primer (255 variants)      | P1                                |         |   | P2 |    |    | P3 |    |    |    | L3 |    |    |    | P3 |    |    | P1 |    |    | J4/2 |    |    |    | P2 |    |   |
| Cycle (number)                   | Name                              | 3                                 | 4       | 5 | 18 | 19 | 20 | 21 | 22 | 25 | 26 | 27 | 28 | 29 | 30 | 31 | 34 | 35 | 36 | 41 | 58 | 77   | 78 | 79 | 80 | 81 |    |   |
| 13(3) / 14-16(5)                 | 13(1), 14(2), 15(2), 16(3), 17(3) | W.T                               | G       | T | C  | C  | A  | C  | C  | T  | T  | C  | G  | C  | G  | G  | T  | G  | A  | C  | G  | G    | T  | A  | A  | G  | G  |   |
|                                  | 16(1), 17(1)                      | 25N1625                           | C       | A | C  | A  | A  | C  | G  | T  | A  | C  | G  | T  | C  | G  | T  | G  | A  | G  | A  | A    | A  | T  | G  | A  | T  | G |
|                                  | 14(2), 15(2), 16(1), 17(2)        | 25N1423                           | C       | G | C  | A  | A  | C  | G  | T  | A  | C  | G  | T  | C  | G  | T  | G  | A  | G  | A  | A    | A  | T  | G  | A  | T  | G |
|                                  | 13(1), 15(3), 16(2), 17(3)        | 25N1322                           | C       | G | C  | A  | A  | C  | G  | T  | A  | C  | G  | T  | C  | G  | T  | G  | A  | G  | A  | A    | A  | T  | G  | A  | T  | A |
|                                  | 14(1), 15(2), 16(2), 17(2)        | 25N1401                           | C       | G | C  | A  | A  | C  | G  | T  | A  | C  | G  | T  | C  | G  | T  | G  | T  | G  | A  | A    | A  | T  | G  | A  | T  | A |
|                                  | 15(1), 16(2), 17(1)               | 25N1505                           | C       | A | C  | T  | A  | C  | G  | T  | T  | C  | G  | T  | C  | G  | T  | G  | T  | G  | A  | A    | A  | T  | G  | A  | G  | A |
|                                  | 16(1), 17(1)                      | 25N1620                           | C       | G | C  | A  | A  | C  | G  | T  | T  | C  | G  | A  | C  | G  | T  | T  | T  | G  | A  | A    | T  | G  | A  | T  | G  |   |
|                                  | 14(1), 17(2)                      | 25N1415                           | T       | G | C  | A  | A  | C  | G  | T  | A  | C  | G  | T  | C  | G  | T  | G  | T  | G  | A  | A    | T  | G  | A  | T  | G  |   |
|                                  | 13(1), 15(1)                      | 25N1313                           | C       | G | G  | A  | G  | C  | A  | T  | A  | C  | G  | T  | T  | G  | C  | G  | T  | G  | A  | A    | T  | G  | A  | T  | G  |   |
|                                  | 14(1), 15(1), 17(2)               | 25N1406                           | G       | T | C  | C  | A  | C  | T  | T  | T  | C  | G  | C  | G  | G  | T  | G  | A  | C  | G  | G    | T  | A  | A  | G  | G  |   |
|                                  | 14(1), 16(1), 17(1)               | 25N1407                           | G       | C | C  | C  | A  | C  | C  | T  | T  | C  | G  | C  | G  | G  | T  | G  | A  | C  | G  | G    | T  | A  | A  | G  | G  |   |
|                                  | 15(1), 16(1), 17(2)               | 25N1525                           | G       | C | C  | C  | A  | C  | C  | T  | T  | C  | G  | C  | G  | G  | T  | G  | A  | C  | G  | G    | T  | A  | A  | G  | G  |   |
|                                  | 14(1), 17(1)                      | 25N1425                           | G       | C | C  | C  | A  | C  | C  | T  | T  | C  | G  | C  | G  | G  | T  | G  | A  | T  | G  | G    | T  | A  | A  | G  | G  |   |
|                                  | 15(1), 16(1)                      | 25N1520                           | G       | C | C  | C  | A  | C  | C  | T  | T  | C  | G  | C  | G  | G  | T  | G  | A  | C  | G  | G    | T  | A  | A  | A  | G  |   |
|                                  | 15(1), 16(2)                      | 25N1501                           | G       | T | C  | C  | A  | C  | C  | T  | T  | C  | G  | C  | G  | G  | T  | G  | A  | C  | A  | G    | T  | A  | A  | G  | G  |   |
|                                  | 15(1), 17(1)                      | 25N1519                           | G       | G | C  | C  | A  | C  | C  | T  | T  | G  | C  | C  | G  | C  | T  | G  | A  | C  | G  | G    | T  | A  | A  | G  | G  |   |
|                                  | 15(1), 16(1), 17(1)               | 25N1504                           | G       | G | T  | C  | A  | C  | C  | T  | T  | C  | G  | C  | G  | G  | T  | G  | A  | C  | G  | G    | T  | A  | A  | G  | G  |   |
|                                  | 15(1), 16(1)                      | 25N1515                           | A       | T | C  | *  | A  | C  | C  | T  | T  | C  | G  | C  | G  | G  | T  | G  | A  | T  | G  | G    | T  | A  | A  | G  | G  |   |
|                                  | 16(1), 17(1)                      | 25N1622                           | T       | G | C  | A  | T  | T  | C  | A  | C  | T  | G  | G  | T  | A  | A  | G  | T  | G  | T  | *    | C  | T  | T  | G  | A  |   |
|                                  | 13(1) / 14-16(1)                  | 13(5), 14(3), 15(3), 16(2), 17(3) | 25N1311 | T | G  | T  | T  | T  | C  | C  | T  | A  | C  | G  | A  | G  | G  | A  | A  | C  | A  | A    | A  | T  | G  | A  | T  | G |
| 14(2), 15(2), 17(1)              |                                   | 25N1416                           | T       | G | C  | T  | T  | C  | C  | T  | A  | C  | G  | G  | G  | G  | A  | A  | C  | A  | A  | A    | T  | G  | A  | T  | G  |   |
| 13(3) / 14-16(8)                 | 13(4), 14(3), 15(1), 16(2), 17(1) | 25N1325                           | T       | G | T  | T  | T  | C  | C  | T  | A  | C  | G  | C  | G  | G  | A  | A  | C  | A  | A  | A    | T  | G  | A  | T  | G  |   |
|                                  | 13(8), 14(5), 15(3), 16(2), 17(2) | 25N1320                           | T       | G | T  | T  | T  | C  | C  | T  | A  | C  | G  | C  | G  | G  | A  | A  | C  | A  | A  | A    | T  | G  | A  | T  | G  |   |
|                                  | 16(1), 17(1)                      | 25N1621                           | G       | G | T  | T  | T  | C  | C  | T  | A  | C  | G  | C  | G  | G  | A  | A  | C  | A  | A  | A    | T  | G  | A  | T  | G  |   |
|                                  | 13(2), 14(2), 15(1), 16(2)        | 25N1303                           | A       | G | T  | T  | T  | C  | C  | T  | A  | C  | G  | C  | G  | G  | A  | A  | C  | A  | A  | A    | T  | G  | A  | T  | G  |   |
| 13(1) / 14-16(2)                 | 13(1), 14(2), 17(1)               | 25N1309                           | T       | G | T  | T  | T  | C  | C  | T  | A  | C  | G  | C  | G  | G  | A  | A  | C  | A  | A  | A    | T  | G  | A  | C  | GG |   |
|                                  | 13(4), 14(4), 15(1), 17(2)        | 25N1307                           | T       | G | T  | T  | T  | C  | C  | T  | A  | C  | G  | C  | G  | G  | A  | A  | C  | A  | A  | A    | T  | A  | A  | T  | G  |   |
|                                  | 13(2), 14(3), 15(2), 16(1), 17(2) | 25N1318                           | T       | G | T  | T  | T  | C  | C  | T  | A  | C  | C  | C  | G  | G  | A  | A  | C  | A  | A  | A    | T  | A  | A  | *  | G  |   |
|                                  | 13(3), 14(3), 15(1), 16(2), 17(1) | 25N1312                           | T       | G | T  | T  | T  | C  | C  | T  | A  | C  | G  | C  | G  | G  | A  | A  | C  | A  | A  | G    | T  | A  | A  | G  | G  |   |
| 13(3) / 14-16(9)                 | 13(2), 14(1), 15(1)               | 25N1315                           | T       | G | T  | T  | T  | C  | C  | T  | A  | C  | G  | C  | G  | G  | T  | A  | C  | A  | A  | A    | T  | A  | A  | A  | G  |   |
|                                  | 13(2), 14(2), 15(1), 16(1)        | 25N1314                           | T       | G | G  | T  | T  | C  | C  | T  | A  | C  | G  | C  | G  | C  | T  | A  | G  | T  | A  | A    | A  | A  | A  | T  | C  |   |
|                                  | 15(1), 16(1)                      | 25N1503                           | G       | G | T  | A  | A  | G  | G  | T  | AA | C  | G  | T  | C  | C  | T  | A  | T  | T  | T  | T    | T  | T  | G  | A  | T  | G |
|                                  | 13(1), 14(1), 17(2)               | 25N1317                           | A       | A | T  | A  | A  | G  | G  | T  | A  | C  | G  | T  | C  | C  | T  | A  | T  | T  | T  | T    | T  | G  | A  | T  | G  |   |
|                                  | 13(1), 14(1), 16(1), 17(1)        | 25N1319                           | A       | A | T  | A  | A  | G  | G  | T  | A  | C  | G  | A  | C  | C  | T  | A  | C  | T  | A  | A    | A  | G  | A  | A  | T  |   |
|                                  | 13(1), 14(1)                      | 25N1308                           | A       | A | T  | T  | A  | G  | C  | T  | A  | C  | G  | C  | G  | C  | T  | A  | G  | T  | A  | A    | G  | A  | A  | A  | G  |   |
|                                  | 13(2), 14(1), 15(1)               | 25N1304                           | A       | C | A  | C  | A  | G  | T  | T  | A  | C  | G  | T  | A  | C  | T  | T  | G  | T  | A  | A    | G  | T  | G  | G  | T  |   |
|                                  | 13(1) / 14-16(2)                  | 25N1420                           | A       | C | A  | C  | A  | G  | T  | T  | A  | C  | G  | T  | A  | C  | T  | T  | G  | T  | A  | A    | G  | T  | G  | T  | G  |   |
|                                  | 15(1), 16(1)                      | 25N1521                           | A       | C | A  | C  | A  | G  | T  | T  | A  | C  | G  | A  | C  | T  | *  | T  | G  | T  | A  | A    | G  | G  | T  | G  | T  |   |
|                                  | 13(1), 14(1), 17(1)               | 25N1310                           | A       | C | A  | C  | A  | G  | T  | T  | A  | G  | C  | T  | A  | C  | T  | T  | G  | T  | A  | A    | G  | G  | T  | G  | T  |   |
| 13(12) / 14-16(21)               | 13(8), 14(5), 15(5), 16(3), 17(2) | 25N1316                           | A       | C | A  | C  | A  | G  | T  | T  | A  | C  | G  | T  | A  | C  | T  | T  | G  | T  | A  | A    | G  | G  | T  | G  | T  |   |
|                                  | 13(2), 14(2), 15(2), 16(1), 17(2) | 25N1326                           | A       | C | A  | C  | A  | G  | T  | T  | A  | C  | G  | T  | A  | C  | T  | T  | G  | T  | A  | A    | G  | A  | T  | G  | T  |   |
|                                  | 15(1), 16(2)                      | 25N1523                           | A       | C | T  | G  | A  | G  | T  | T  | G  | T  | G  | *  | A  | C  | T  | A  | G  | T  | A  | A    | T  | G  | A  | T  | G  |   |
|                                  | 13(3), 14(2), 15(2), 17(2)        | 25N1321                           | A       | C | A  | A  | A  | C  | T  | T  | T  | C  | G  | T  | A  | G  | T  | T  | G  | A  | A  | T    | G  | A  | T  | A  |    |   |
|                                  | 15(1), 16(1)                      | 25N1509                           | A       | C | G  | G  | A  | C  | C  | T  | A  | C  | G  | T  | G  | G  | T  | T  | G  | T  | A  | A    | G  | T  | A  | C  | G  |   |
| 16(1), 17(2)                     | 25N1610                           | G                                 | C       | G | A  | G  | C  | T  | T  | A  | C  | G  | T  | A  | G  | C  | C  | G  | T  | A  | A  | A    | A  | C  | T  | G  |    |   |

\* indicates deletion of a nucleotide

Supplementary data Table 3  
Nehdi and Perreault  
HDV ribozyme *in vitro* selection
